# Supplementary material for: Microfabricated passive resonator biochip for sensitive radiofrequency detection and characterization of glucose
Source: Royal Society of Chemistry journal article supplement (doi:10.1039/c8ra04243h), 2018-01-01
Supplement: c8ra04243h1.pdf [file c8ra04243h1.pdf]

**Supplementary Materials:**

## **Microfabricated passive resonator biochip for sensitive radiofrequency detection and characterization of glucose†**

Gyan Raj Koirala,<sup>a</sup> Eun-Seong Kim,<sup>a</sup> Rajendra Dhakal,<sup>ba</sup> Zorigt Chuluunbaatar,<sup>a</sup> Yong Hwa Jo,<sup>ca</sup> Sung-Soo Kim,<sup>ca</sup> and Nam-Young Kim\*<sup>a</sup>

---

<sup>a</sup> RFIC Fusion Laboratory, Department of Electronic Engineering, Kwangwoon University, Seoul, South Korea

<sup>b</sup> Department of Computer Science and Engineering, Sejong University, Seoul, South Korea

<sup>c</sup> Department of Biochemistry and Molecular Biology, Kyung-Hee University, Seoul, South Korea

\*Correspondence: nykim@kw.ac.kr

## Contents

|                                                                                 |   |
|---------------------------------------------------------------------------------|---|
| 1. Response of the proposed sensor as a function of glucose concentrations..... | 3 |
| 2. Quantitative measures .....                                                  | 4 |
| 3. Reliability and selectivity .....                                            | 5 |
| 4. Reproducibility.....                                                         | 6 |

## 1. Response of the proposed sensor as a function of glucose concentrations

Table S1: Measurement results for different glucose concentrations.

| Samples<br>(mg·dL <sup>-1</sup> ) | Iteration 1 |            | Iteration 2 |            | Iteration 3 |            | Mean ± Standard Error |                 |
|-----------------------------------|-------------|------------|-------------|------------|-------------|------------|-----------------------|-----------------|
|                                   | $f_o$       | $ S_{11} $ | $f_o$       | $ S_{11} $ | $f_o$       | $ S_{11} $ | $f_o$ (GHz)           | $ S_{11} $ (dB) |
| DI                                | 0.541       | -34.04     | 0.547       | -33.037    | 0.541       | -33.572    | 0.543±0.002           | -33.549±0.289   |
| 50                                | 0.596       | -32.273    | 0.608       | -31.810    | 0.590       | -31.982    | 0.598±0.005           | -32.022±0.135   |
| 75                                | 0.657       | -31.974    | 0.651       | -31.214    | 0.663       | -30.926    | 0.657±0.003           | -31.371±0.312   |
| 100                               | 0.706       | -30.606    | 0.702       | -29.323    | 0.706       | -30.173    | 0.704±0.002           | -30.034±0.376   |
| 125                               | 0.767       | -29.219    | 0.779       | -29.423    | 0.761       | -28.606    | 0.769±0.005           | -29.082±0.245   |
| 150                               | 0.816       | -27.635    | 0.810       | -28.126    | 0.816       | -27.332    | 0.812±0.004           | -27.698±0.231   |
| 175                               | 0.877       | -27.205    | 0.871       | -27.137    | 0.871       | -27.721    | 0.873±0.002           | -27.355±0.184   |
| 200                               | 0.939       | -26.652    | 0.939       | -25.472    | 0.946       | -25.735    | 0.943±0.004           | -25.953±0.357   |
| 225                               | 1.006       | -25.398    | 0.994       | -23.389    | 0.994       | -23.972    | 0.998±0.004           | -24.253±0.597   |
| 250                               | 1.049       | -24.113    | 1.055       | -22.679    | 1.043       | -24.739    | 1.049±0.003           | -23.843±0.609   |

$f_o$  is in gigahertz, and  $|S_{11}|$  is in decibels.

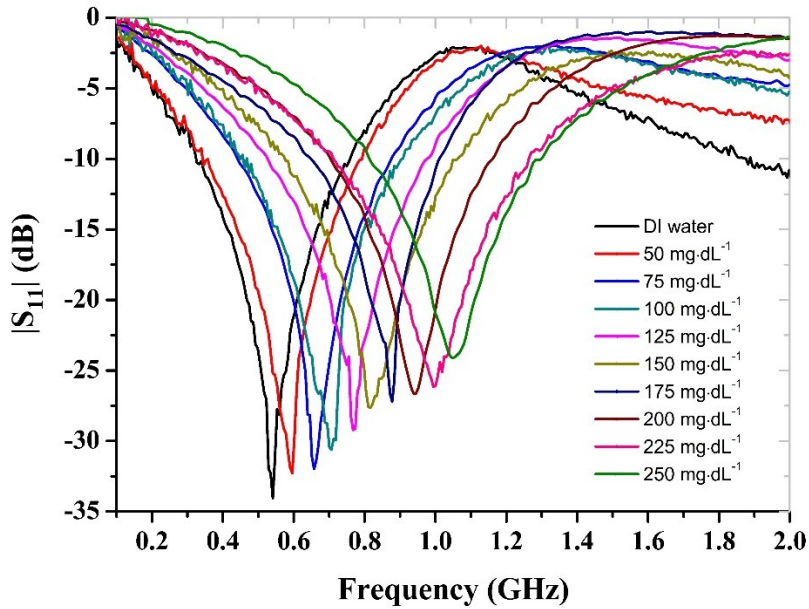

Fig. S1: RF response (first iteration) of the proposed sensor with respect to the different glucose concentrations.

## 2. Quantitative measures

### A. Measurement of loaded quality factor ( $Q_L$ ) and coupling coefficient ( $k$ )

$$Q_L = \frac{f_o}{B_{3-dB}}; B_{3-dB} = f_h - f_l$$

$$k = \frac{f_h^2 - f_l^2}{f_h^2 + f_l^2}$$

where  $f_h$  and  $f_l$  are the high- and low-frequency values of the 3-dB bandwidth and  $f_o$  is the fundamental resonance frequency of each sample.

### B. Definition of limit of detection and limit of quantitation:

**Limit of detection (LoD):** The lowest amount of the analyte (here glucose concentration) in a sample which can be detected. The limit of detection in this study was calculated as follows:

$$\text{LoD} = (\text{Standard Error in the resonance frequency corresponding to the glucose concentration/slope}) * 3.3$$

**Limit of quantitation (LoQ):** The lowest amount of analyte (here glucose concentration) which can be quantitatively determined with suitable precision and accuracy.

$$\text{LoQ} = (\text{Standard Error in the resonance frequency corresponding to the glucose concentration/slope}) * 10$$

### 3. Reliability and selectivity

**Table S2: Interference of sucrose in the resonance characteristics of the proposed glucose sensor.**

| Test* | Samples<br>(mg·dL <sup>-1</sup> ) | Concentration measured from proposed sensor (mg·dL <sup>-1</sup> ) |                                             | Cohen's d-score<br><br>((Mean (X)-Mean (Y))/σ <sub>XY</sub> ) |
|-------|-----------------------------------|--------------------------------------------------------------------|---------------------------------------------|---------------------------------------------------------------|
|       |                                   | Only glucose                                                       | Glucose + Sucrose (10 mg·dL <sup>-1</sup> ) |                                                               |
| 1     | 100                               | 98.20±0.4474                                                       | 96.10±1.2675                                | 1.4084                                                        |
| 2     | 150                               | 146.83±0.7064                                                      | 146.01±0.7415                               | 0.6497                                                        |
| 3     | 200                               | 203.27±0.8395                                                      | 205.9215±0.6665                             | -2.0325                                                       |

\*- Each test was iterated three times with DI water treatment and subsequent surface drying

#### 4. Reproducibility

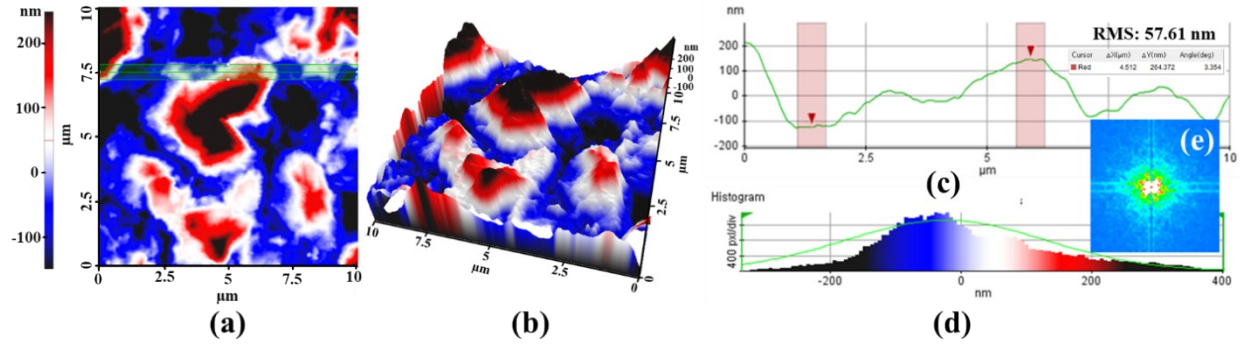

Fig. S2: Post-treatment surface morphology of the proposed sensor. (a) 2D and (b) 3D images of the exposed metal layer. (c) Surface roughness of the selected area showing a maximum variation of 254.372 nm of the selected region resulting in an RMS value of 57.61 nm [Fig. S2 (a)]. (d) Histogram plot of the overall measured sensor area (10 μm × 10 μm). (e) Power spectrum.
